# Supplementary material for: The behavior, attitude, and knowledge towards photoprotection in patients with cutaneous/systemic lupus erythematosus: a comparative study with 526 patients and healthy controls
Source: Royal Society of Chemistry journal article supplement (doi:10.1039/d0pp00073f), 2020-07-13
Supplement: d0pp00073f1.pdf [file d0pp00073f1.pdf]

**Supplementary table: Summary on the history, organ involvement, cutaneous signs, laboratories and disease severity of SLE patients at diagnosis**

| Disease history                                                     |              |
|---------------------------------------------------------------------|--------------|
| Duration(years), median (IQR)                                       | 8 (3 - 14)   |
| Follow-up at dermatology OPD, N (%)                                 | 44 (16.7)    |
| Positive of history of organ involvement, N (%)                     |              |
| Skin                                                                | 162 (61.6)   |
| Renal                                                               | 150 (57.0)   |
| Hematology                                                          | 152 (57.8)   |
| Arthritis                                                           | 49 (18.6)    |
| Serositis                                                           | 3 (1.1)      |
| Current cutaneous sign, N (%)                                       |              |
| Acute cutaneous lupus erythematosus (ACLE)                          | 12 (4.6)     |
| Subacute cutaneous lupus erythematosus (SCLE)                       | 2 (0.8)      |
| Chronic cutaneous lupus erythematosus (CCLE)                        | 31 (11.8)    |
| Laboratory at time of diagnosis, N (%positive) and disease severity |              |
| ANA                                                                 | 242 (92.4)   |
| Homogeneous                                                         | 105 (48.0)   |
| Speckled                                                            | 93 (42.3)    |
| Nucleolar                                                           | 19 (8.6)     |
| Peripheral                                                          | 3 (1.3)      |
| Cytoplasmic                                                         | 2 (0.9)      |
| Anti-dsDNA                                                          | 107 (43.7)   |
| ESR (mm/hr), median (IQR)                                           | 29 (15 - 46) |
| SLEDAI-2K score, median (IQR)                                       | 0 (0 - 2)    |

*Anti-dsDNA: Anti-double stranded DNA; ANA: Anti-nuclear antibody; ESR: Erythrocyte sedimentation rate; mm/hr: millimeters per hour (mm/hr); CLE: Cutaneous Lupus Erythematosus; IQR: Interquartile range; OPD: Outpatient department; SD: standard deviation; SLE: Systemic Lupus Erythematosus; SLEDAI-2K: Systemic Lupus Erythematosus Disease Activity Index 2000; USD: United States dollar.*
